# Supplementary material for: Melatonin Application Alleviates Stress-Induced Photosynthetic Inhibition and Oxidative Damage by Regulating Antioxidant Defense System of Maize: A Meta-Analysis
Source: MDPI journal article supplement (doi:10.3390/antiox11030512), 2022-03-08
Supplement: s1 [file s1]

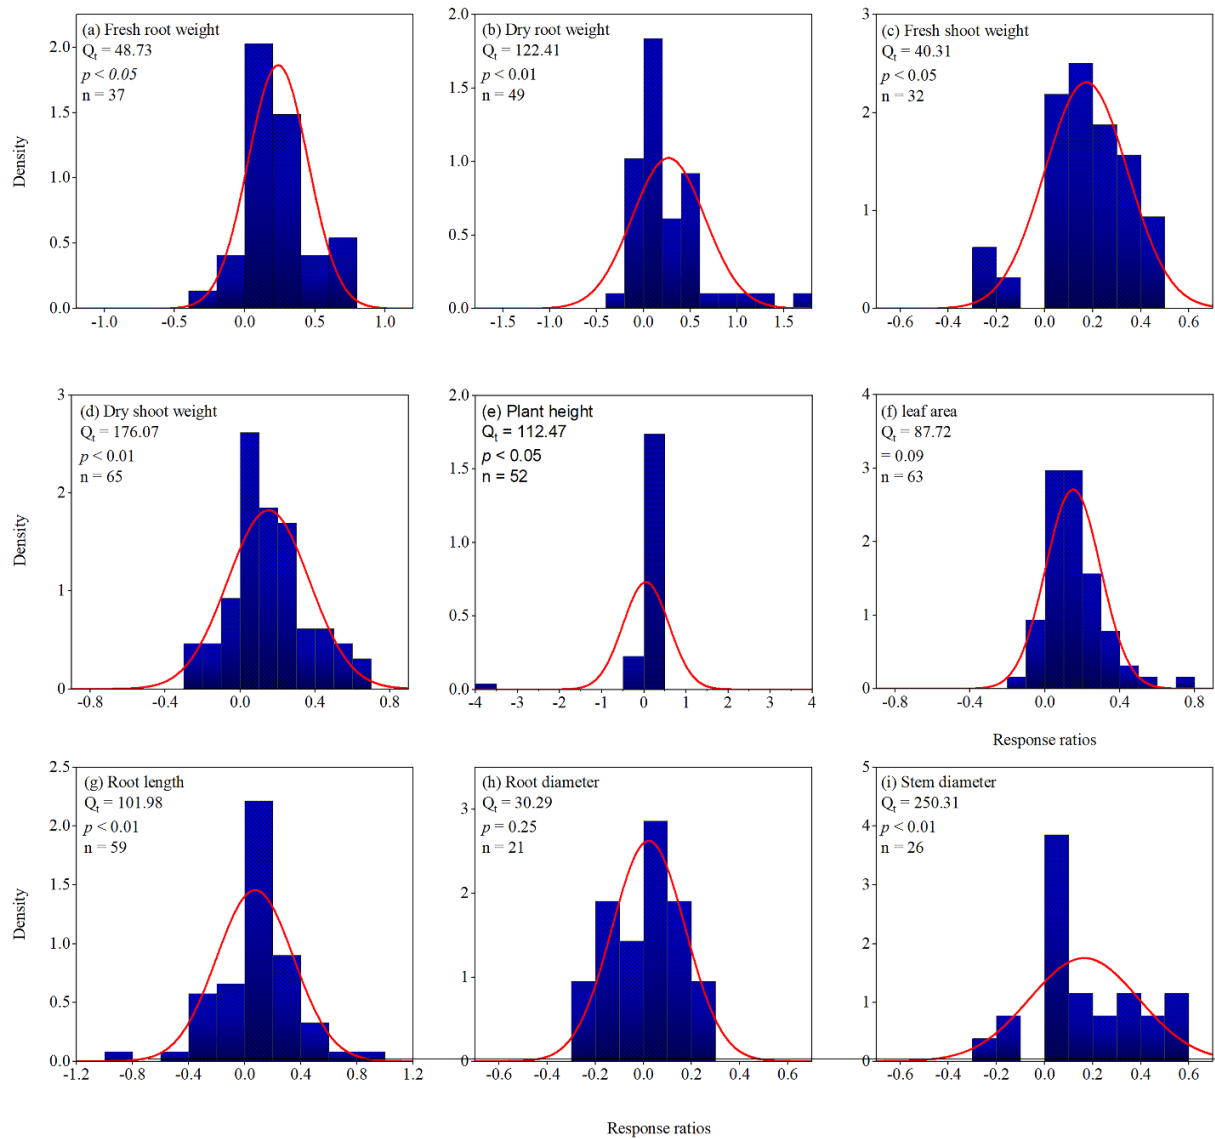

**Fig.**

**Figure S1.** Kernel density estimates (smoothed version of the histogram) for plant growth parameters. The red curves were fitted by the Gaussian function using the software Origin 2021.  $Q_t$  is among studies heterogeneity for all observations in the meta-analysis and  $n$  is the number of paired observations.

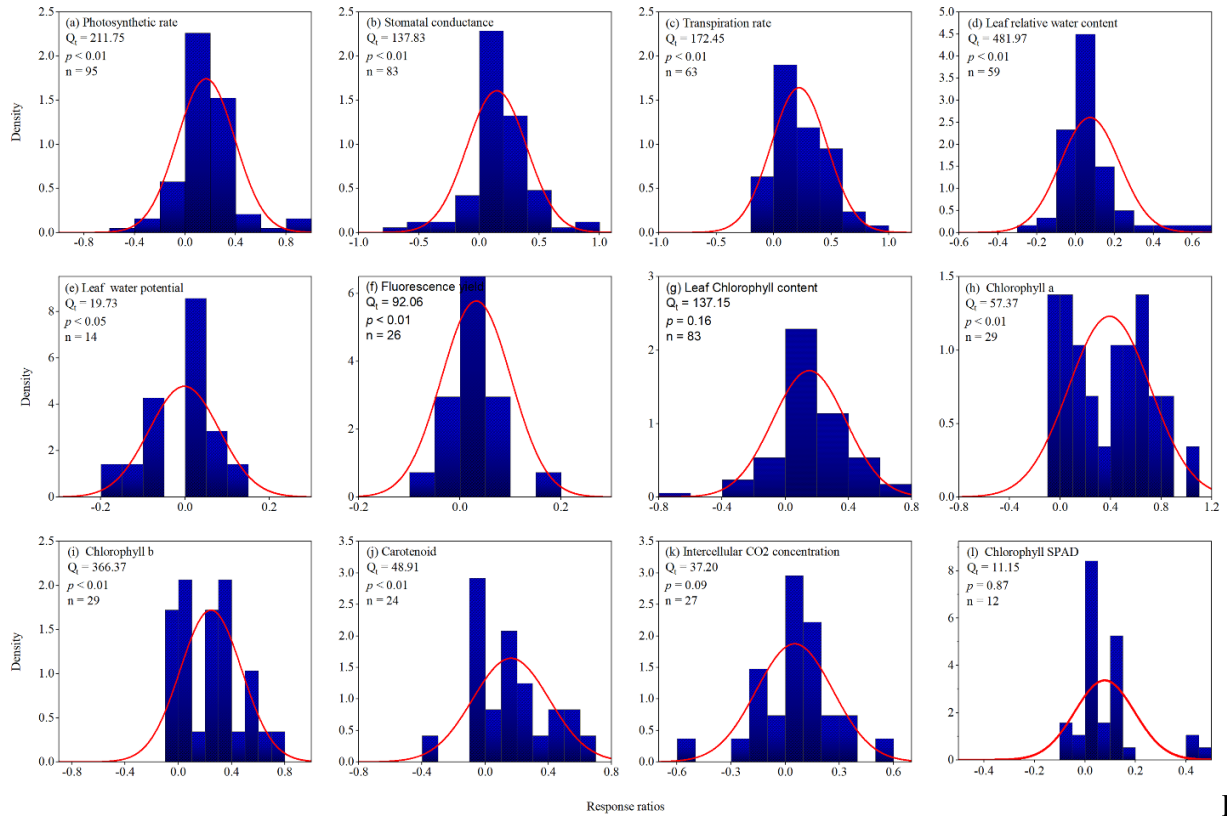

**Fig.**

**Figure S2.** Kernel density estimates (smoothed version of the histogram) for gas exchange parameters, and chlorophyll pigments. The red curves were fitted by the Gaussian function using the software Origin 2021.  $Q_i$  is among studies heterogeneity for all observations in the meta-analysis and  $n$  is the number of paired observations.

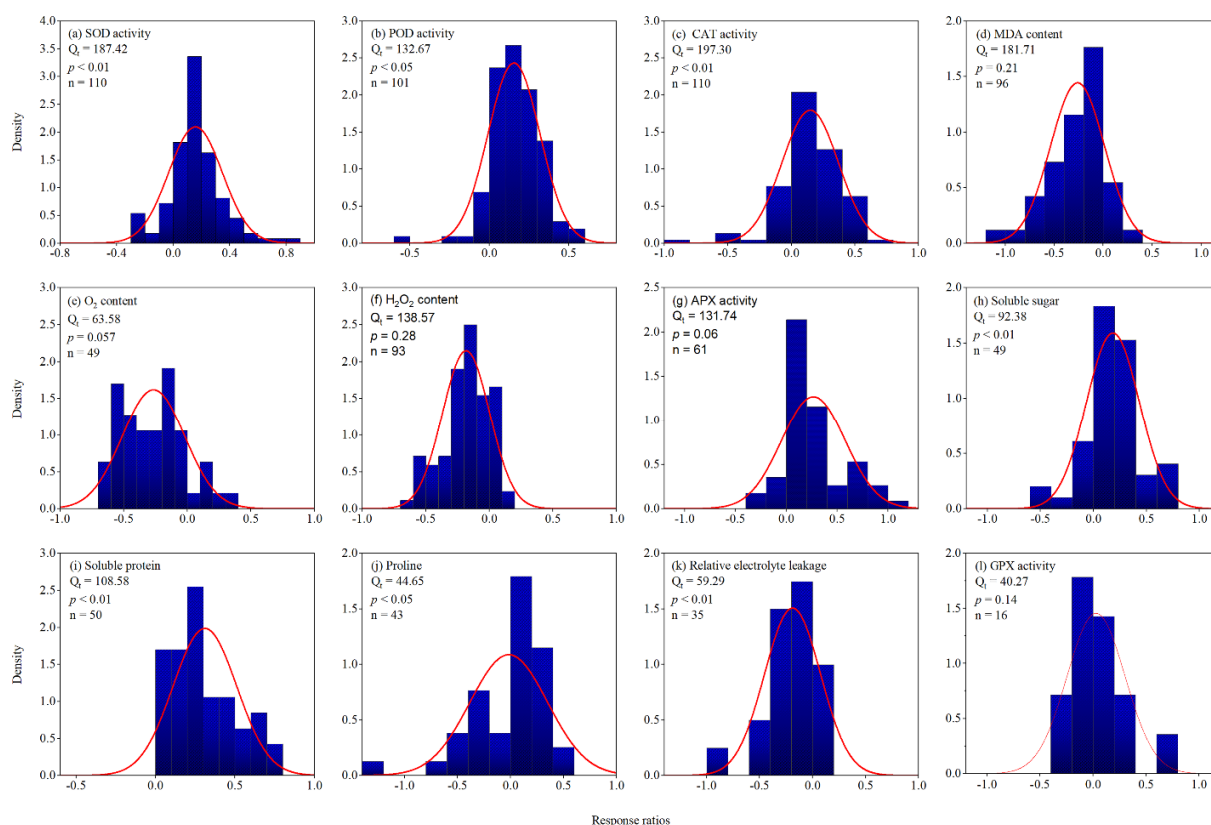

**Fig.**

**Figure S3.** Kernel density estimates (smoother version of the histogram) for antioxidant enzymes, soluble sugar, soluble protein, proline, and relative electro leakage. The red curves were fitted by the Gaussian function using the software Origin 2021.  $Q_t$  is among studies heterogeneity for all observations in the meta-analysis and  $n$  is the number of paired observations.

**Table S1.** Observations' number (n) and results of testing publication bias and heterogeneity for each target variable.

| <b>Moderator</b>        | <b>Variables</b>                            | <b>Number of Observations (n)</b> | <b>Fail-Safe Number (N)</b> | <b>p-Value for Rank-Order Correlation</b> | <b>Percent I-Square (%I<sup>2</sup>)</b> |
|-------------------------|---------------------------------------------|-----------------------------------|-----------------------------|-------------------------------------------|------------------------------------------|
| Growth parameter        | Fresh root weight                           | 37                                | 23615                       | 0.1590                                    | 135                                      |
|                         | Dry root weight                             | 49                                | 25879                       | 0.0519                                    | 255                                      |
|                         | Fresh shoot weight                          | 32                                | 41993                       | 0.1410                                    | 130                                      |
|                         | Dry shoot weight                            | 65                                | 41058                       | 0.7055                                    | 275                                      |
|                         | Plant height                                | 52                                | 30788                       | 0.1673                                    | 221                                      |
|                         | Leaf area                                   | 63                                | 61699                       | 0.4359                                    | 142                                      |
|                         | Root length                                 | 59                                | 14782                       | 0.2882                                    | 176                                      |
| Gas exchange parameters | Root diameter                               | 21                                | 216                         | 0.6658                                    | 151                                      |
|                         | Photosynthetic rate                         | 95                                | 48264                       | 0.0538                                    | 225                                      |
|                         | Stomatal conductance                        | 83                                | 66551                       | 0.0061                                    | 168                                      |
|                         | Transpiration rate                          | 63                                | 45573                       | 0.0852                                    | 278                                      |
| Chlorophyll pigments    | Intercellular CO <sub>2</sub> concentration | 27                                | 748                         | 0.3647                                    | 143                                      |
|                         | Total chlorophyll                           | 83                                | 61203                       | 0.0007                                    | 167                                      |
|                         | Chlorophyll a                               | 29                                | 7370                        | 0.1682                                    | 205                                      |
|                         | Chlorophyll b                               | 29                                | 6039                        | 0.7803                                    | 130                                      |
| Leaf water              | Carotenoid                                  | 24                                | 3998                        | 0.2127                                    | 213                                      |
|                         | Relative water content                      | 60                                | 18560                       | 0.0259                                    | 831                                      |
| Plant enzymes           | SOD                                         | 110                               | 148417                      | 0.0081                                    | 174                                      |
|                         | POD                                         | 101                               | 73009                       | 0.0004                                    | 133                                      |
|                         | CAT                                         | 110                               | 115831                      | 0.4025                                    | 183                                      |
|                         | APX                                         | 61                                | 48188                       | 0.7782                                    | 227                                      |
|                         | GPX                                         | 16                                | 3.7                         | 0.0848                                    | 268                                      |
| ROS                     | O <sub>2</sub>                              | 49                                | 42536                       | 0.4543                                    | 135                                      |
|                         | H <sub>2</sub> O <sub>2</sub>               | 93                                | 91624                       | 0.7422                                    | 151                                      |
| MDA                     | MDA                                         | 96                                | 106138                      | 0.1946                                    | 191                                      |
| Proline                 | Proline                                     | 43                                | 1797                        | 0.6915                                    | 106                                      |
| Soluble sugar           | Soluble sugar                               | 49                                | 10497                       | 0.0066                                    | 192                                      |
| Soluble protein         | Soluble protein                             | 50                                | 66576                       | 0.0119                                    | 222                                      |
| Electro leakage         | Electro leakage                             | 35                                | 38714                       | 0.2057                                    | 191                                      |
